# Supplementary material
Source: Springer Nature journal article supplement (https://www.springermedizin.de/resource/supplementary/12895_2013_175_MOESM2_ESM.pdf/9514214)

**a**

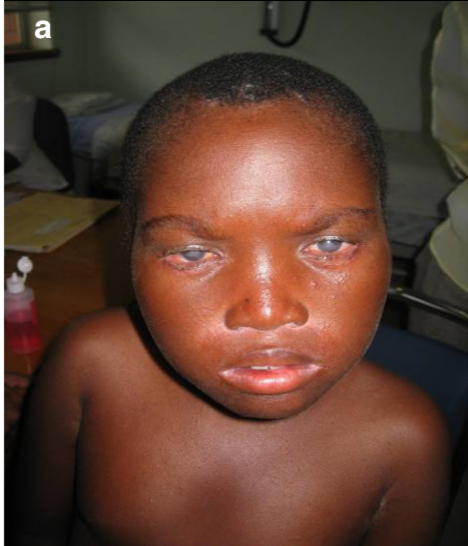

**b**

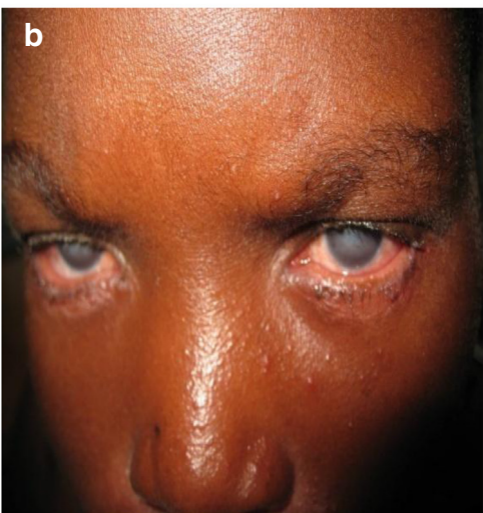

**c**

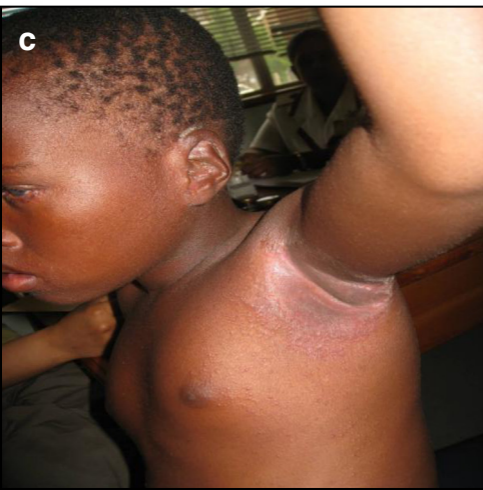

Supplement: MOESM2 [file 9514214]
